# Supplementary material for: Chromatographic Profile and Redox-Modulating Capacity of Methanol Extract from Seeds of Ginkgo biloba L. Originating from Plovdiv Region in Bulgaria
Source: MDPI journal article supplement (doi:10.3390/life12060878), 2022-06-12
Supplement: s1 [file s1]

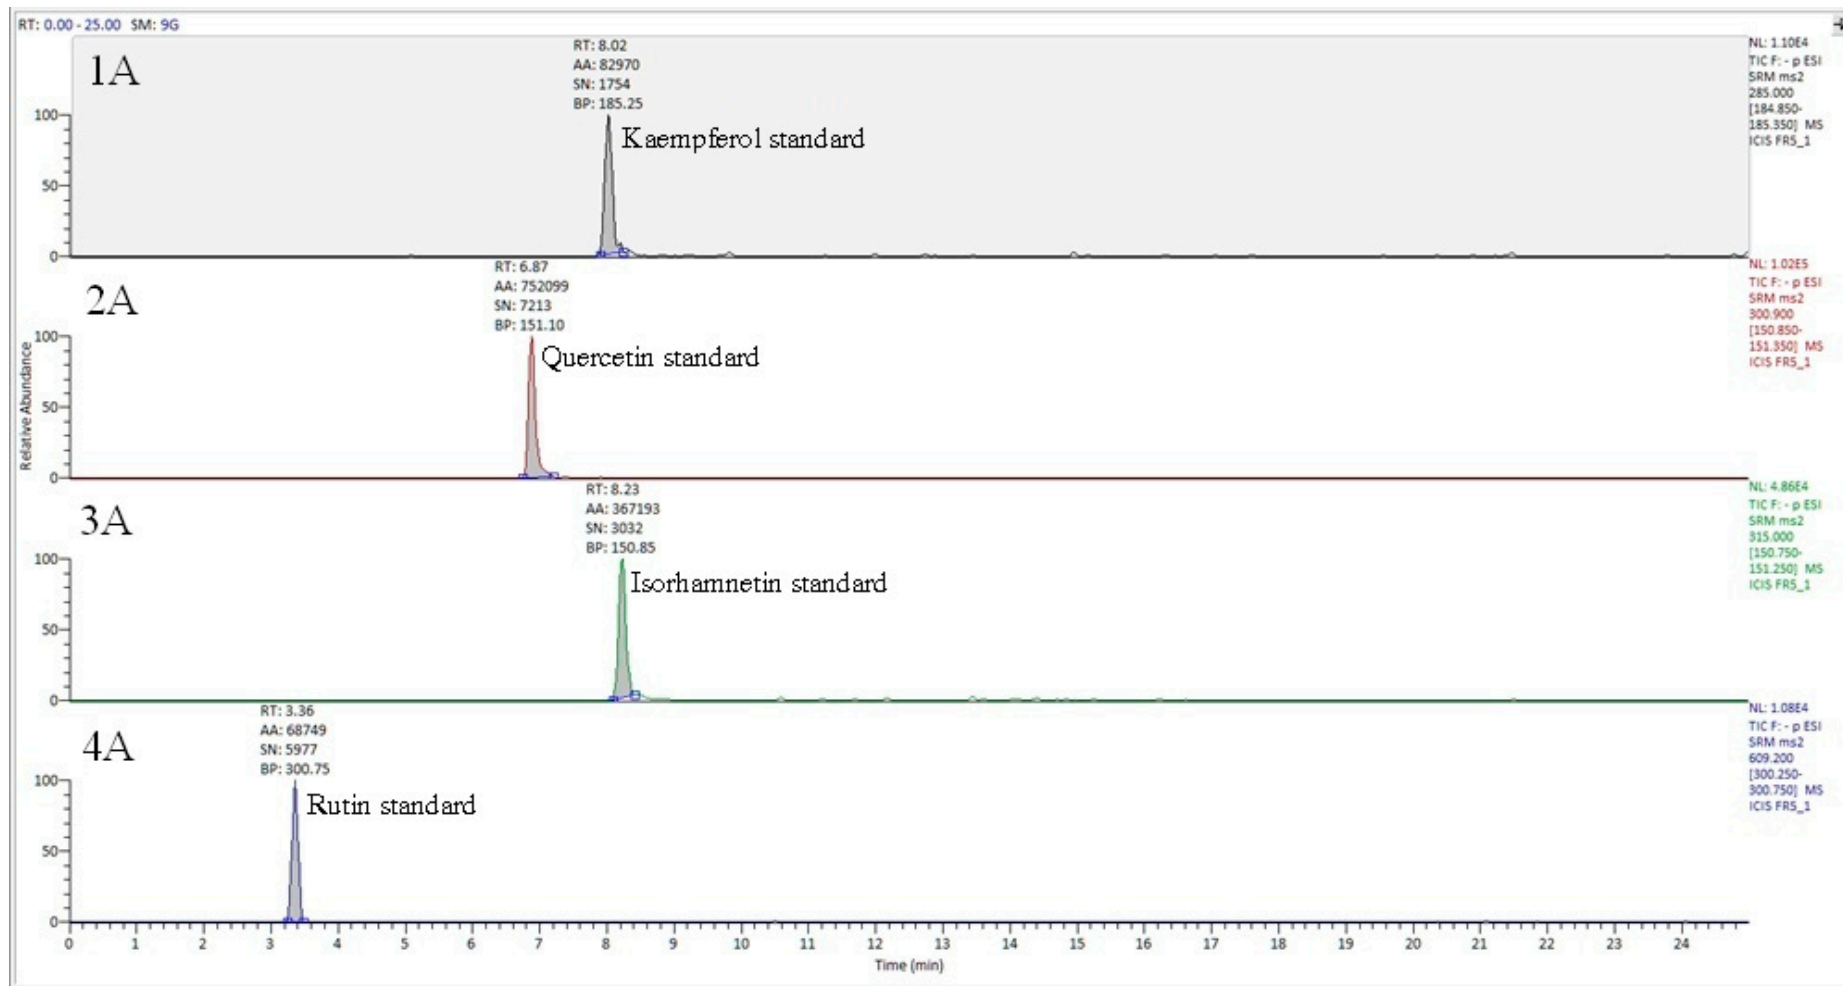

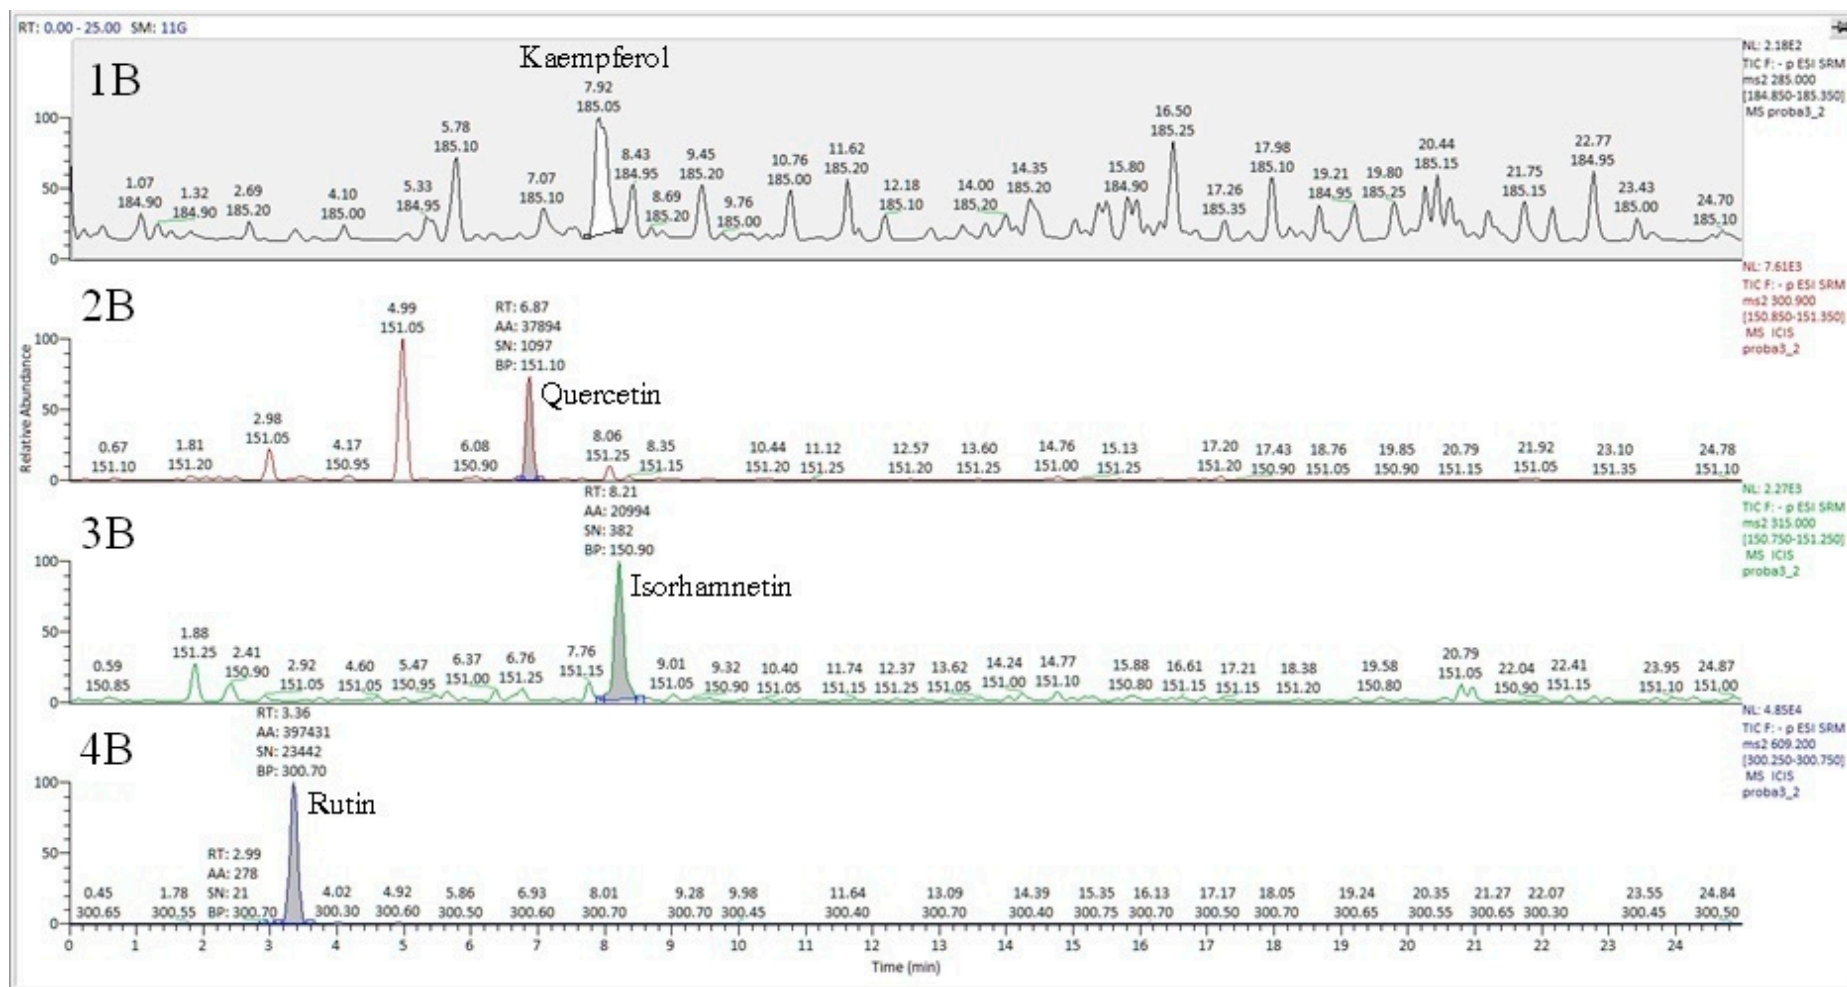

Figure S1. Chromatograms of flavonoids standards: Kaempferol (1A), Quercetin (2A), Isorhamnetin (3A), Rutin (4A) and of flavonoids in GBSE: Kaempferol (1B), Quercetin (2B), Isorhamnetin (3B), Rutin (4B).

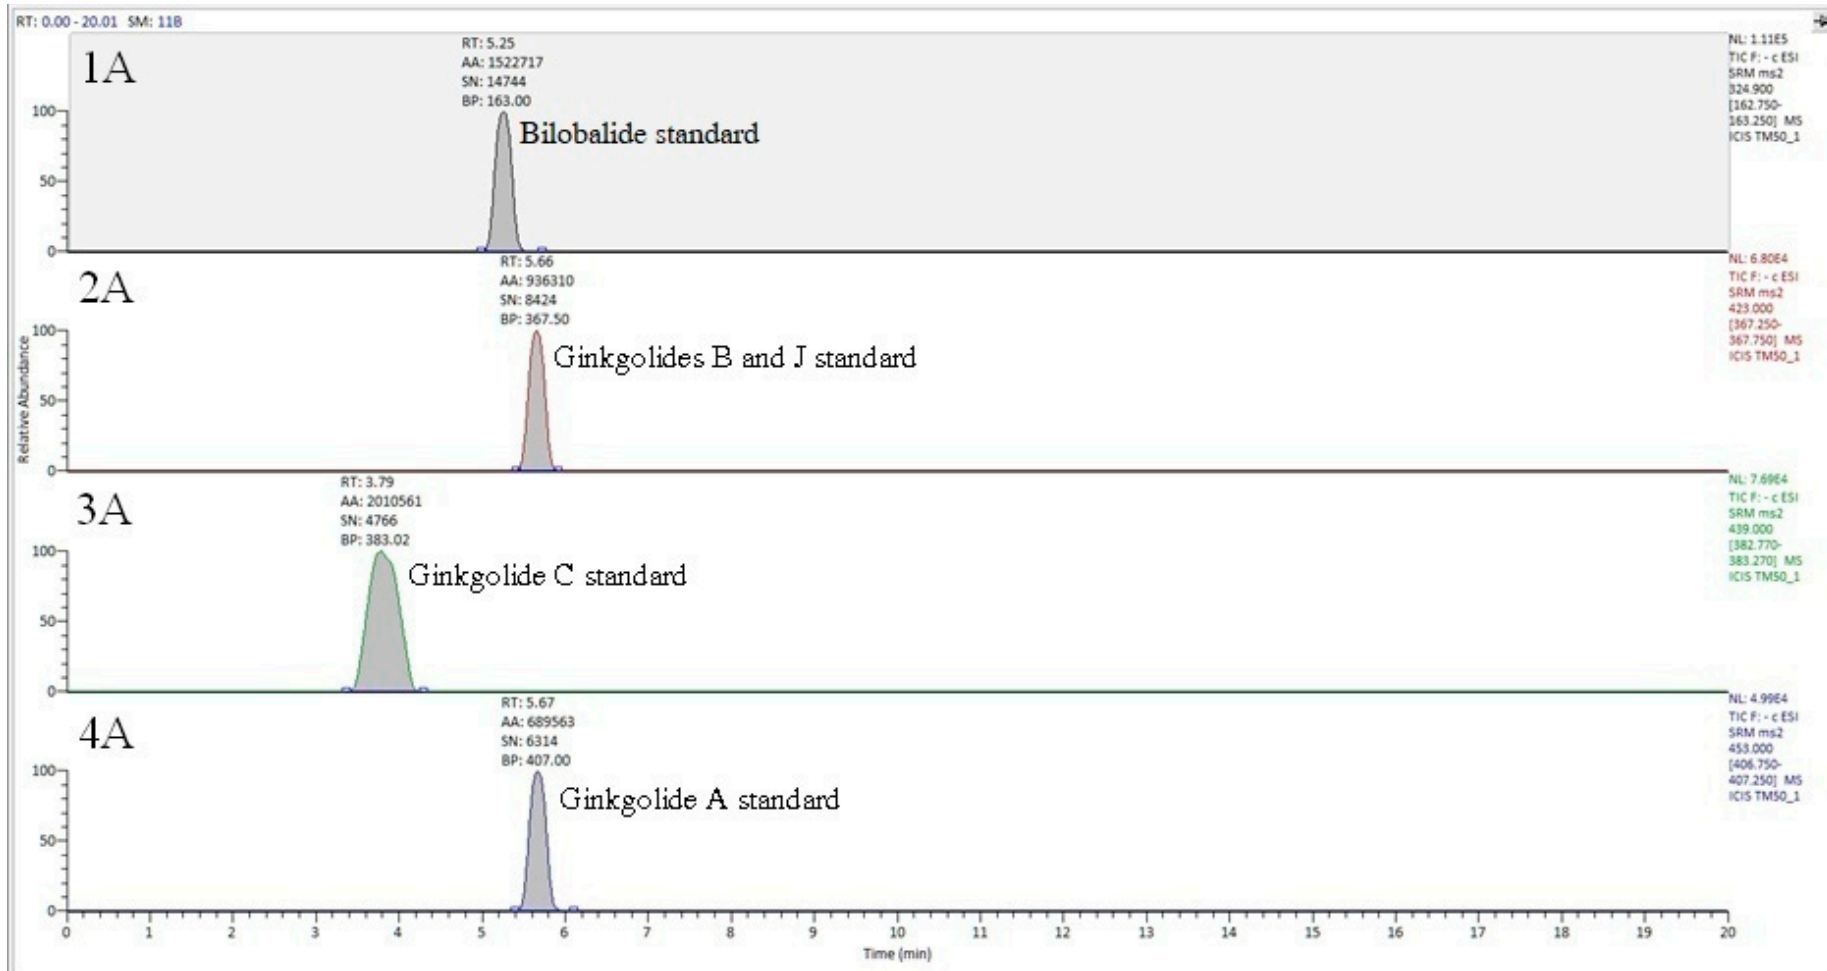

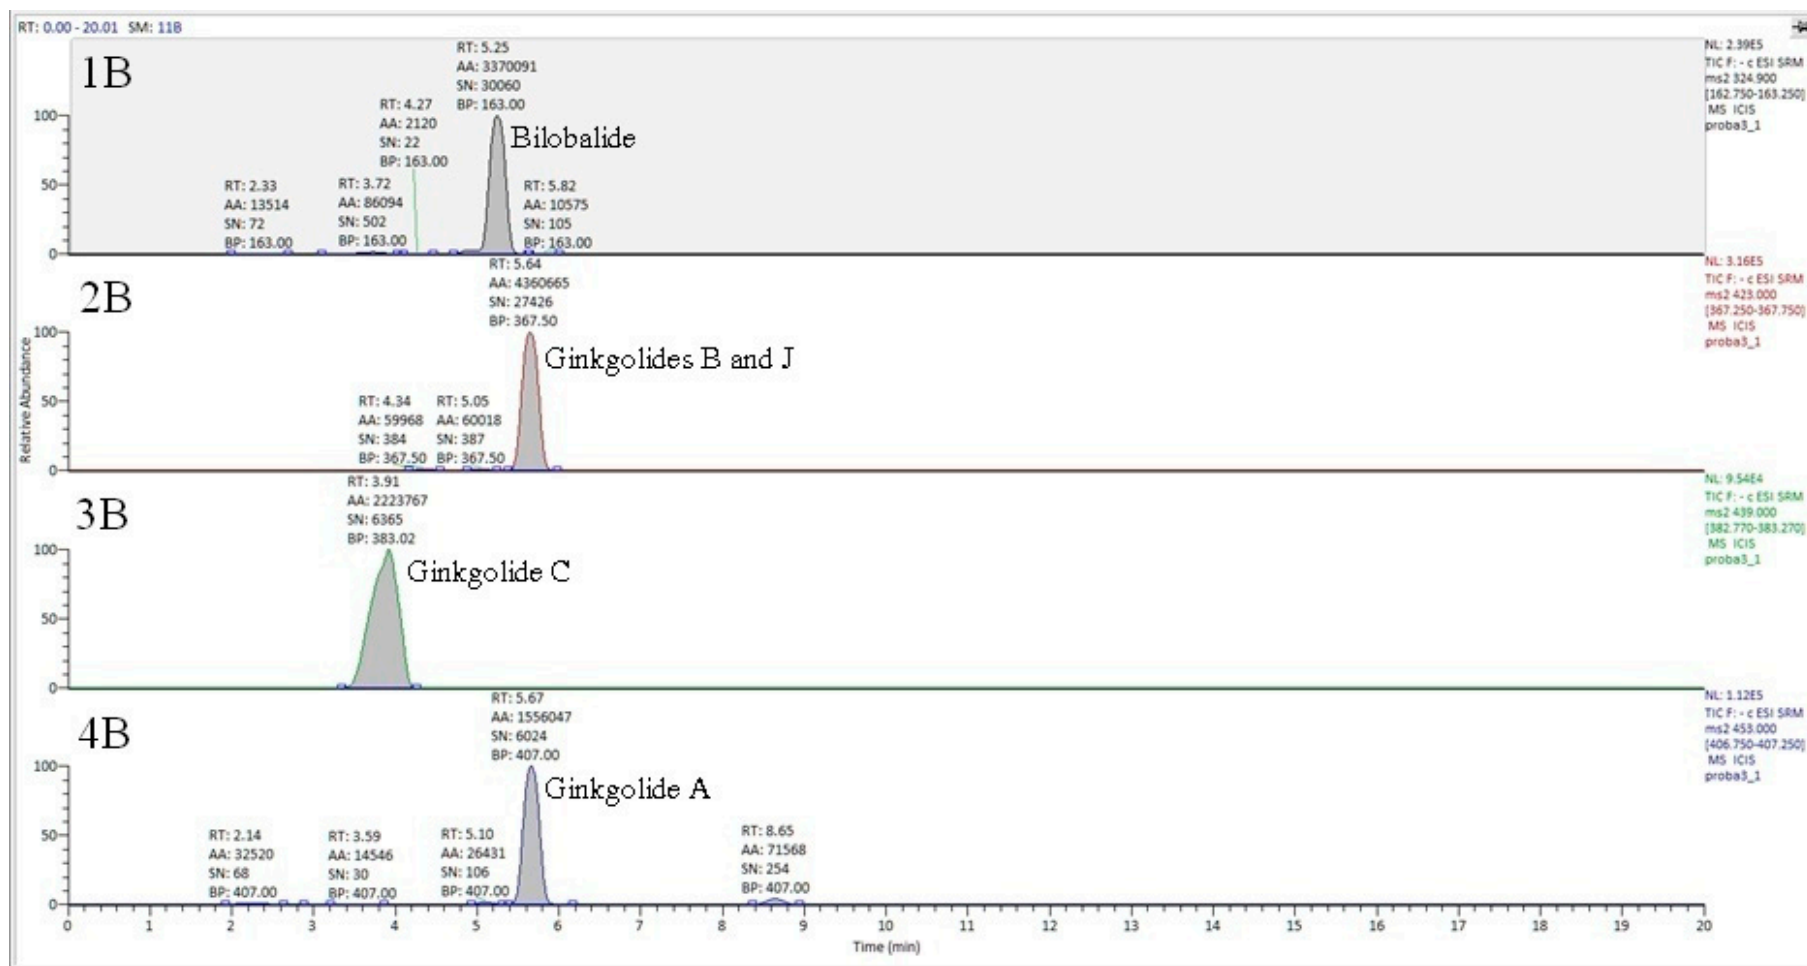

Figure S2. Chromatograms of terpenes standards: Bilobalide (1A), Ginkgolides B and J (2A), Ginkgolide C (3A), Ginkgolide A (4A) and of terpenes in GBSE: Bilobalide (1B), Ginkgolides B and J (2B), Ginkgolide C (3B), Ginkgolide A (4B).

RT: 0.00 - 25.00 SM: 118

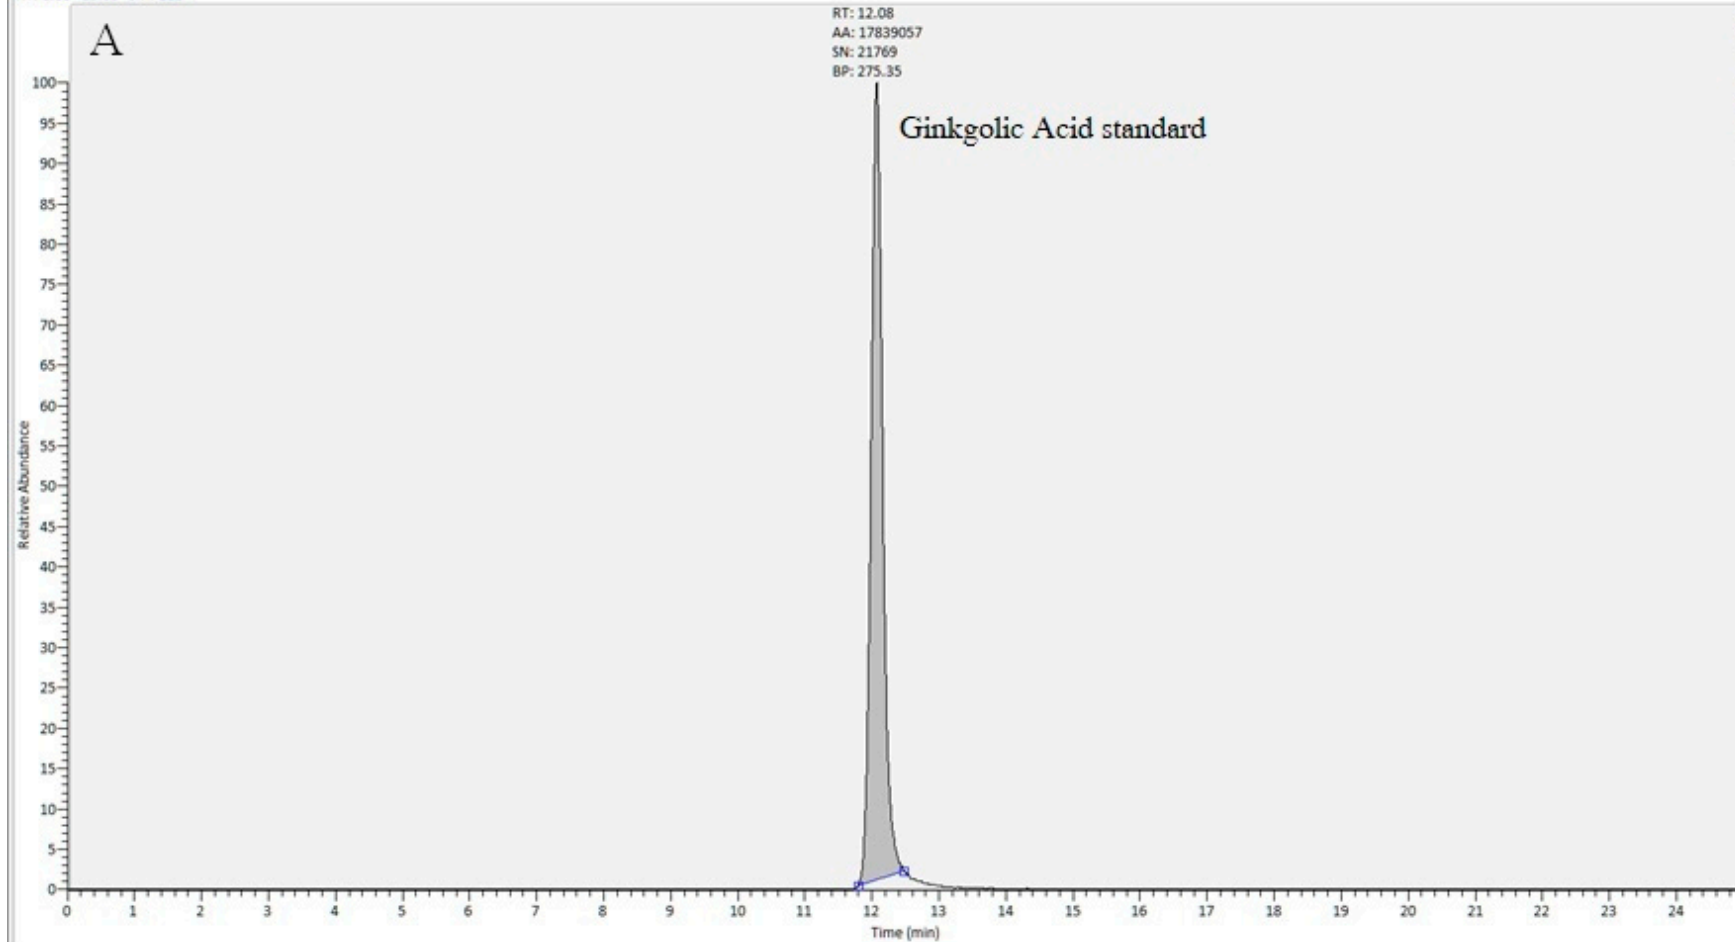

NL:  
1.49E6  
TIC F: -p ESI  
SRM ms2  
319.200  
[275.050-  
275.550] MS  
ICIS GA5\_1

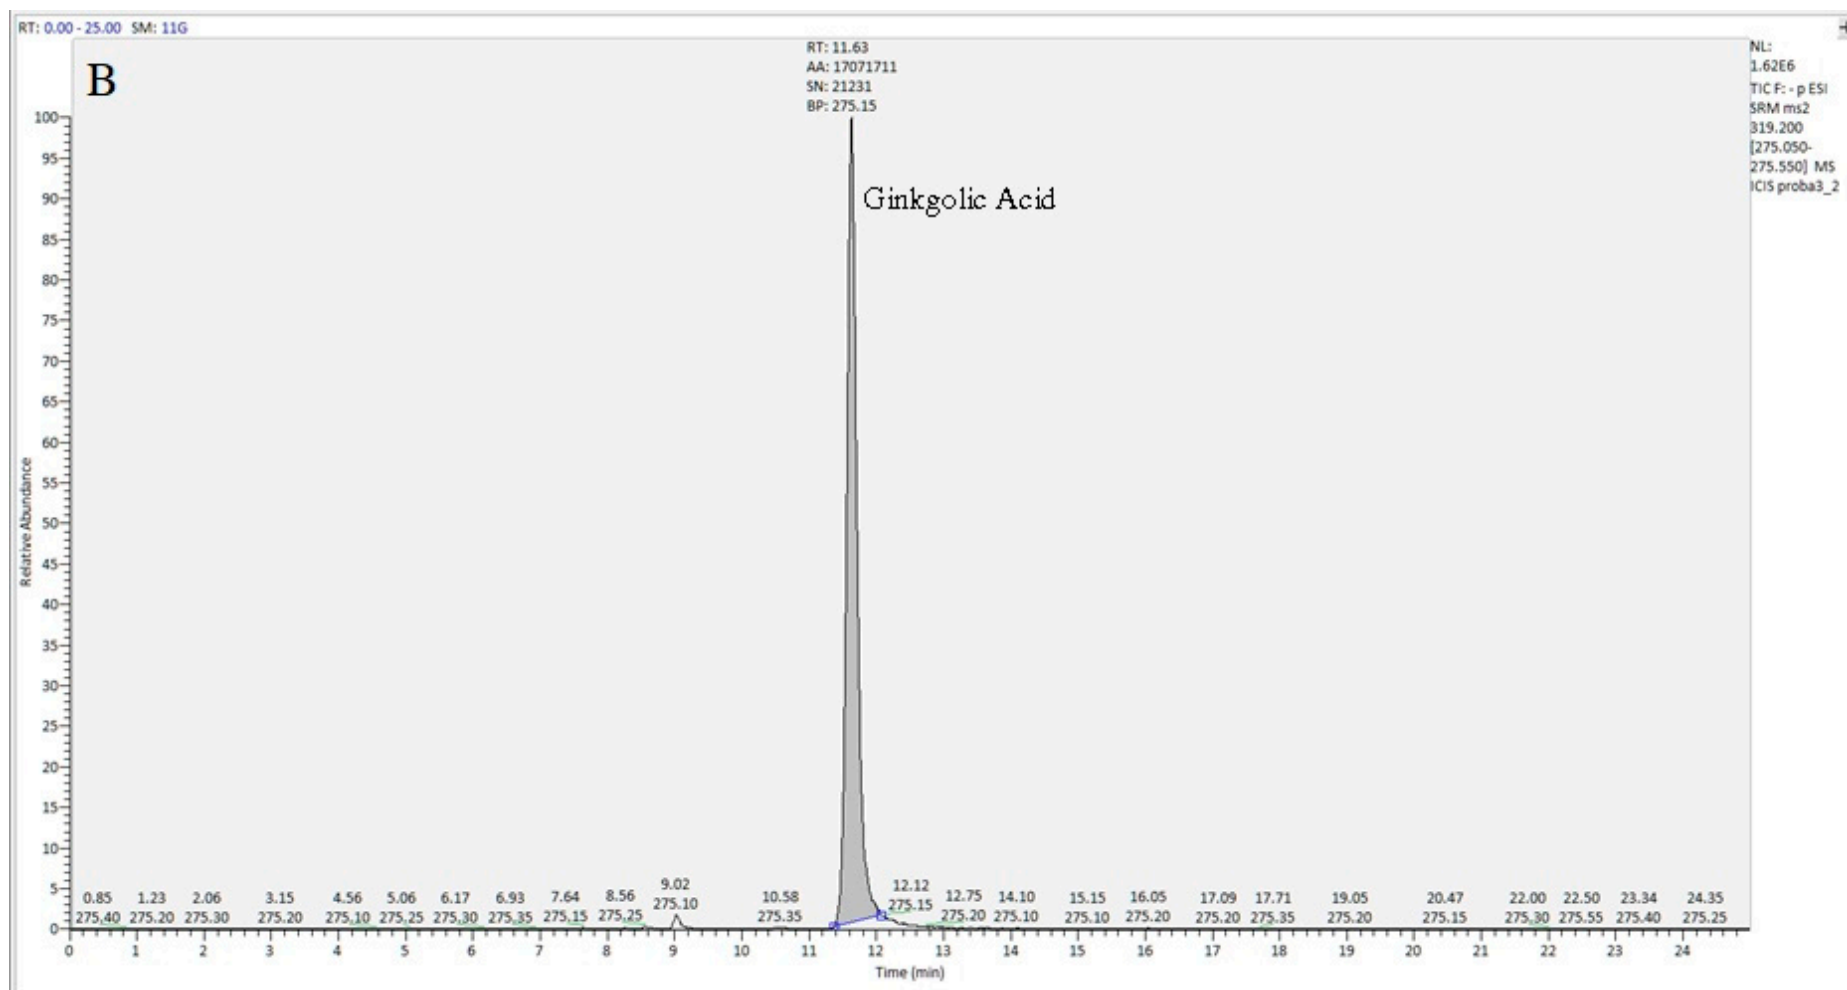

Figure S3. Chromatogram of Ginkgolic Acid standard (A) and of Ginkgolic Acid in GBSE (B).

RT: 0.00 - 20.00 SM: 11B

A

RT: 7.11  
AA: 1097313838  
SN: 123716  
BP: 151.99

Ginkgotoxin standard

NL:  
1.62E8  
TIC F: + p ESI  
SRM ms2  
183.970  
[151.790-  
152.290] MS  
ICIS Gtox20\_1

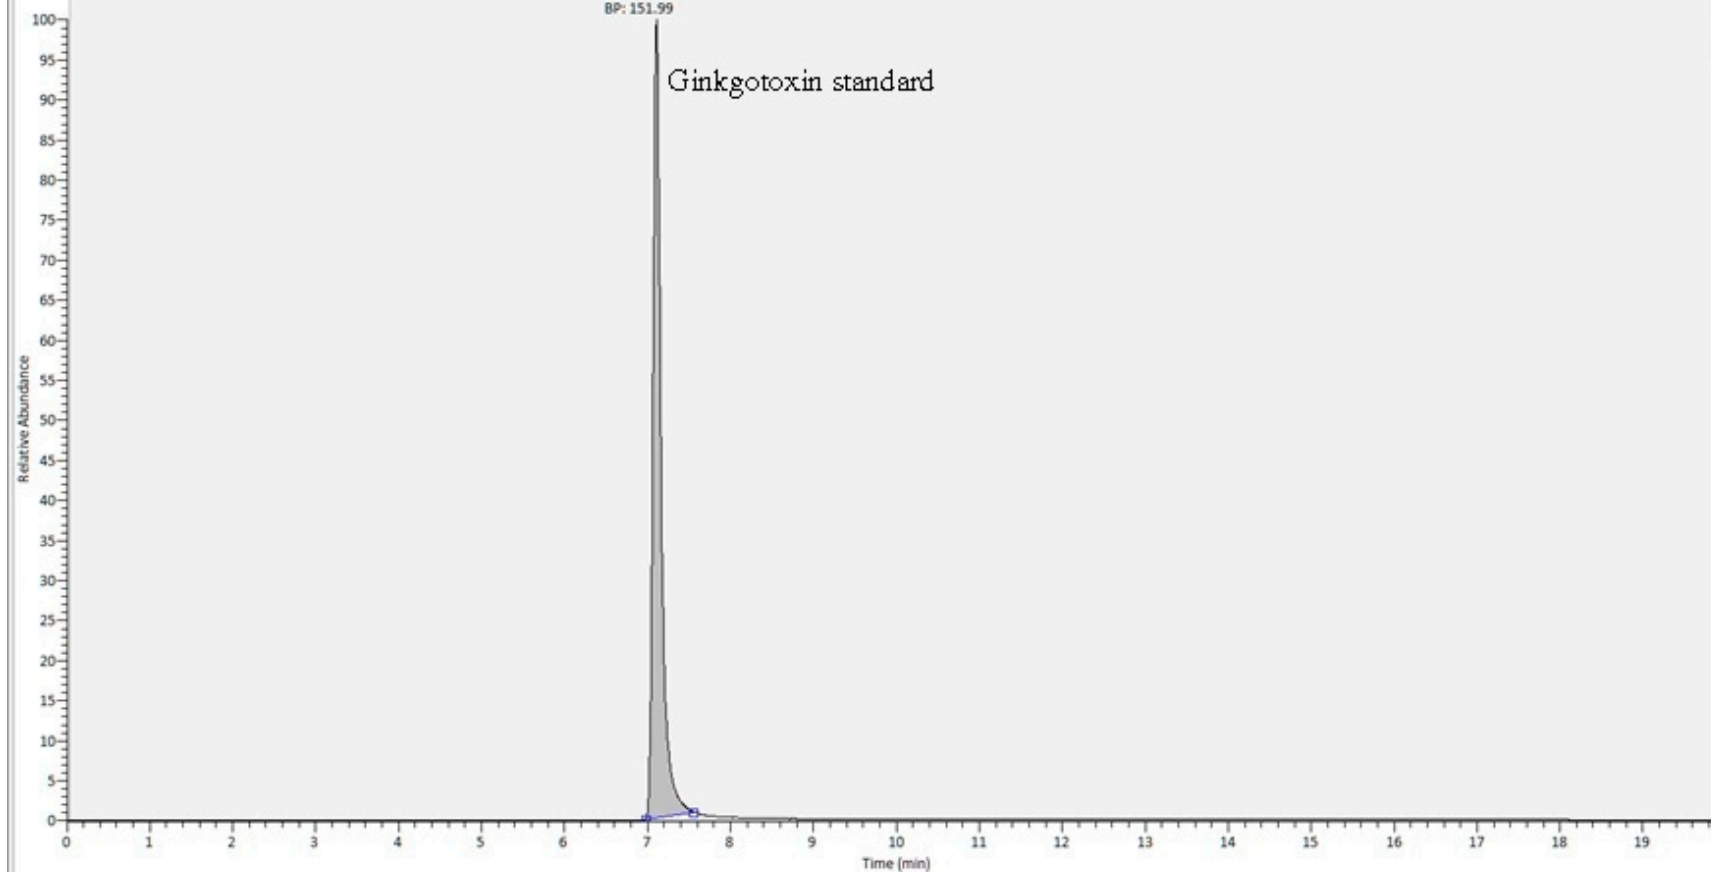

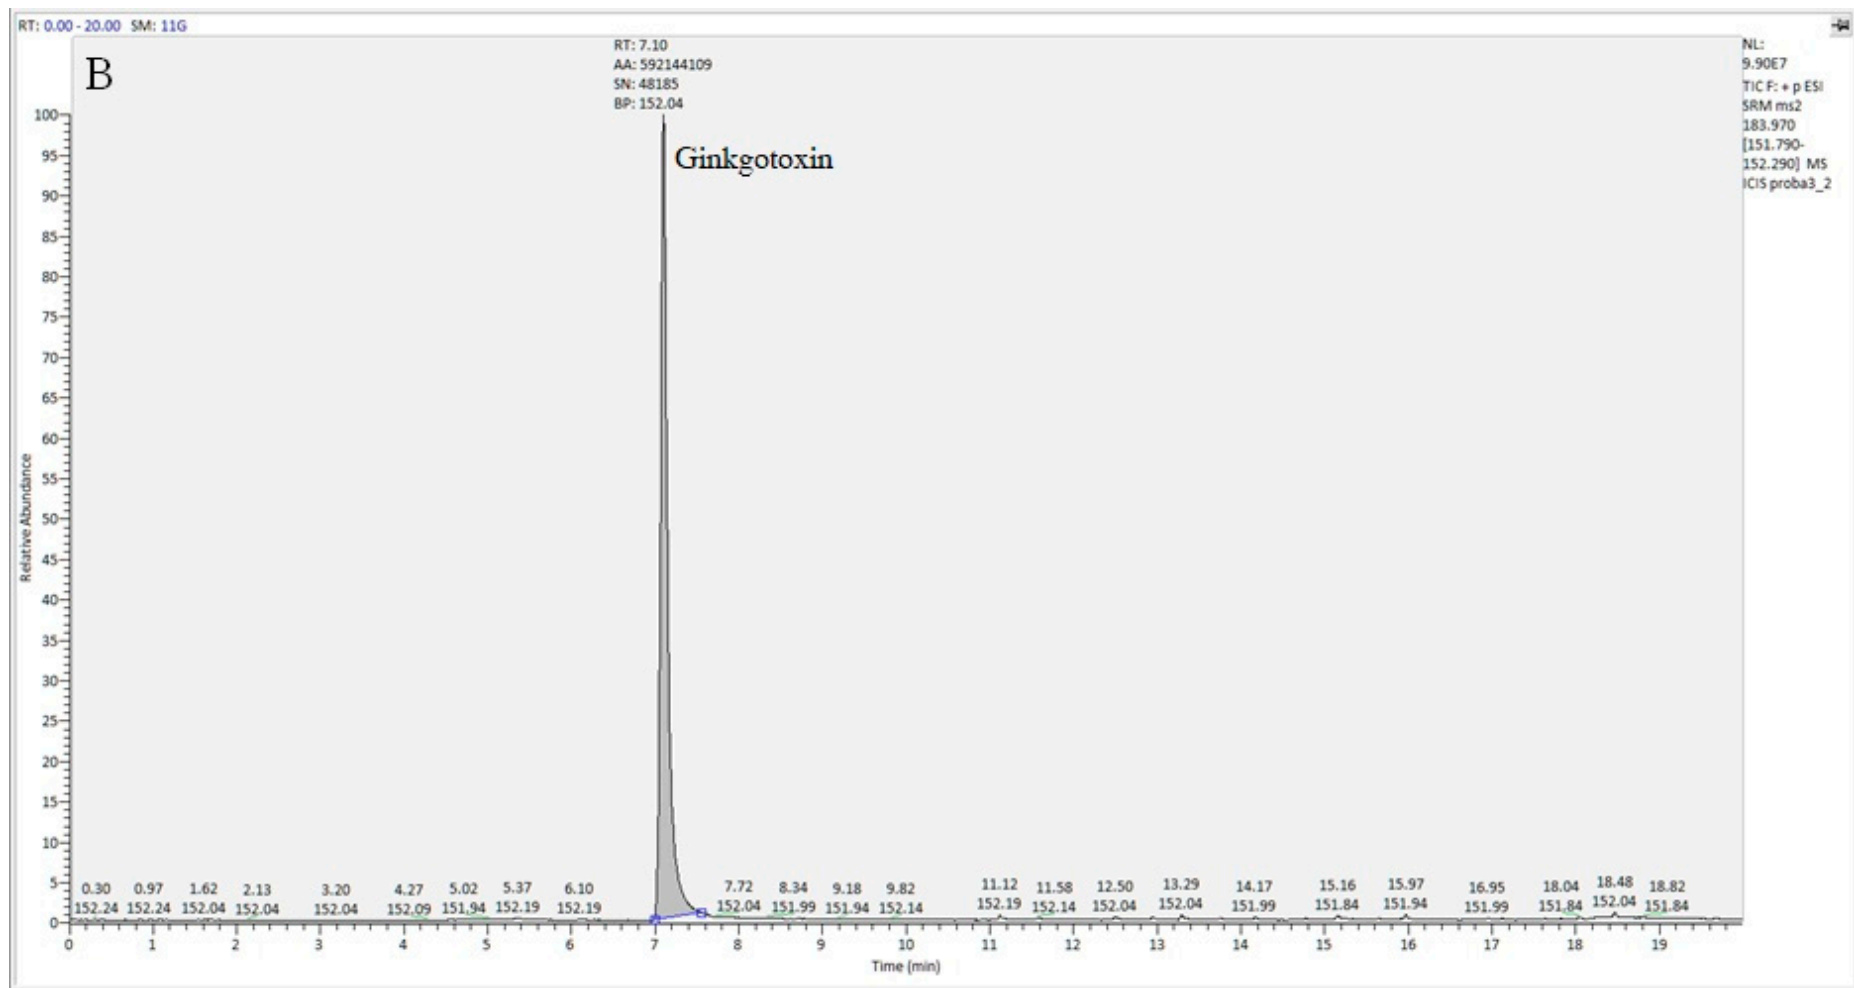

Figure S4. Chromatogram of Ginkgotoxin standard (A) and of Ginkgotoxin in GBSE (B).
